# Supplementary material for: Novel Insights into Total Flavonoids of Rhizoma Drynariae against Meat Quality Deterioration Caused by Dietary Aflatoxin B1 Exposure in Chickens
Source: MDPI journal article supplement (doi:10.3390/antiox12010083), 2022-12-30
Supplement: s1 [file s1]

**Table S1: The composition of TFRD**

| Chemical composition  | Content  |         |
|-----------------------|----------|---------|
|                       | µg/g     | %       |
| Rutin                 | 401592   | 97.8233 |
| Quercetin             | 7072.626 | 1.7228  |
| Quercetin 3-glucoside | 1119.576 | 0.2727  |
| Myricetin             | 192.0882 | 0.0468  |
| Kaempferol            | 149.7704 | 0.0365  |
| Astragalin            | 148.6356 | 0.0362  |
| Genistin              | 79.12365 | 0.0193  |
| Genistein             | 47.70714 | 0.0116  |
| Taxifolin             | 28.42508 | 0.0069  |
| Cynaroside            | 22.18828 | 0.0054  |
| Formononetin          | 18.52867 | 0.0045  |
| Luteolin              | 18.25931 | 0.0044  |
| Isovitexin            | 13.03135 | 0.0032  |
| Naringenin            | 9.408299 | 0.0023  |
| Biochanin A           | 6.306109 | 0.0015  |
| Vitexin               | 4.016406 | 0.001   |
| Daidzein              | 2.543361 | 0.0006  |
| Apigenin              | 1.512769 | 0.0004  |
| Liquiritigenin        | 1.027148 | 0.0003  |
| Quercitrin            | 1.00514  | 0.0002  |
| Glycitein             | 0.086143 | 0       |
| Chrysin               | 0.014538 | 0       |

**Table S2: Assignment of major bands in Raman spectra**

| Band assignment               | Wavenumber (cm <sup>-1</sup> ) <sup>a</sup> |
|-------------------------------|---------------------------------------------|
| Amide III' ( $\alpha$ -helix) | 830, 850                                    |
| Amide III' (random coil)      | 940                                         |
| Amide III' ( $\beta$ -sheet)  | 960                                         |
| Phenylalanine                 | 1003                                        |
| Amide III ( $\beta$ -sheet)   | 1224, 1242                                  |
| Amide III ((random coil)      | 1250                                        |
| Amide III ( $\alpha$ -helix)  | 1265, 1279, 1305                            |
| Amide I ( $\alpha$ -helix)    | 1645, 1655                                  |
| Amide I (random coil)         | 1665                                        |
| Amide I ( $\beta$ -sheet)     | 1667, 1676                                  |
| Amide I ( $\beta$ -turns)     | 1685                                        |

<sup>a</sup>  $\pm 3 - 5 \text{ cm}^{-1}$

**Table S3: Primer sequences for quantitative real-time PCR analysis.**

| Gens          | Gene bank ID   | Primer sequence (5'-3')                             | Products length |
|---------------|----------------|-----------------------------------------------------|-----------------|
| IL-1 $\beta$  | XM_015297469.2 | F: GACCAAAGCTGCTGCGGAGGC<br>R: GAAGGACTGTGAGCGGGTGT | 154             |
| IL-6          | NM_204628.1    | F: CTGCCCAAGGTGACGGAG<br>R: GGTAGGTCTGAAAGGCGAACA   | 103             |
| IL-10         | NM_001004414.2 | F: TGCCAAGCCCTGTTGCTG<br>R: TCATCGTCCCTGGATTGAAAA   | 158             |
| TNF- $\alpha$ | XM_040647309.1 | F: GGACAGCCTATGCCAACAAGT<br>R: ACACGACAGCCAAGTCAACG | 168             |
| SOD           | NM_205064.1    | F: CCGGCTTGTCTGATGGAGAT<br>R: TGCATCTTTTGGTCCACCGT  | 125             |
| CAT           | NM_001031215.2 | F: GGTTCGGTGGGGTTGTCTTT<br>R: CACCAGTGGTCAAGGCATCT  | 213             |
| GST           | NM_001001777.1 | F: AGAGTCGAAGCCTGATGCAC<br>R: CACTCCGCTTATCAGCAAACA | 220             |
| GPX1          | NM_001277853.2 | F: ACGGCGCATCTTCCAAAG<br>R: TGTTCCTCCCAACCATTTCTC   | 73              |
| GAPDH         | NM-204305.1    | F: CCTCTCTGGCAAAGTCCAAG<br>R: GGTCACGCTCCTGGAAGATA  | 176             |

Note: F. Forward primer; R. Reverse primer.
